# Supplementary material for: RNAseq-based gene expression profiling of the Anopheles funestus pyrethroid-resistant strain FUMOZ highlights the predominant role of the duplicated CYP6P9a/b cytochrome P450s
Source: PubMed Central journal article supplement (PMC8727960; doi:10.1093/g3journal/jkab352), 2021-10-09
Supplement: jkab352_supplementary_data.pdf [file jkab352_supplementary_data.pdf]

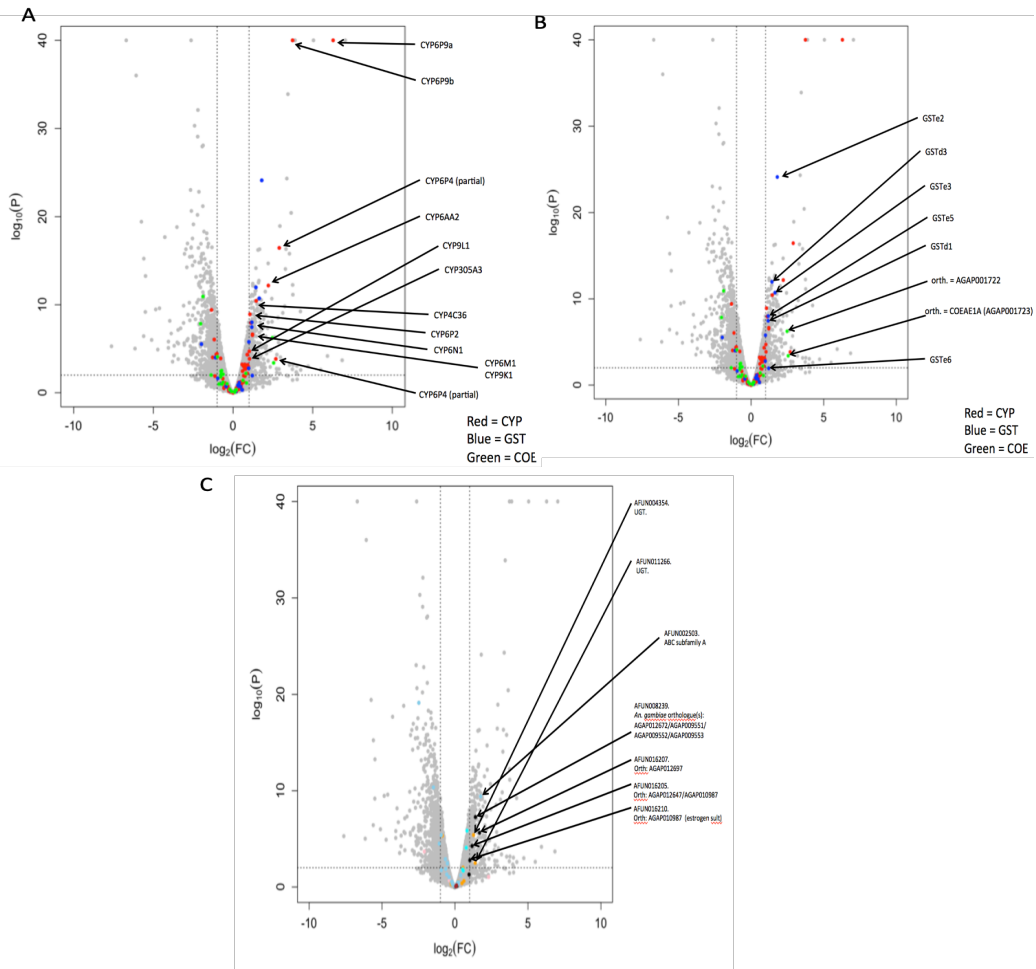

**Figure S1:** Volcano plot of differential expression of major detoxification gene families between FUMOZ and FANG: A) Main over-expressed cytochrome P450 genes in FUMOZ (in red); B) Main over-expressed glutathione S-transferase genes in FUMOZ (in blue); C) Other over-expressed detoxification gene families in FUMOZ (in red).

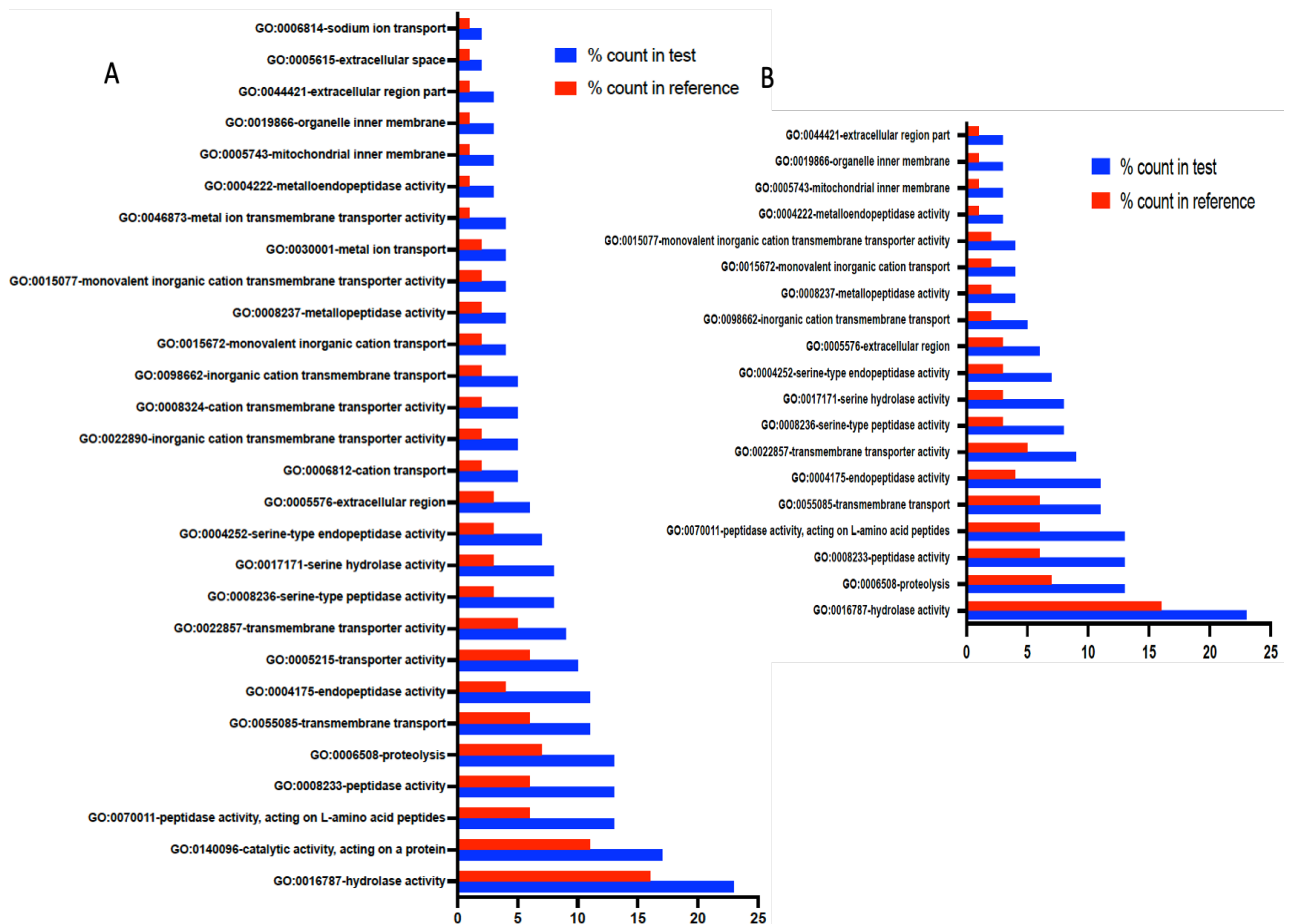

**Figure S2:** Gene Ontology (GO) terms enriched in transcripts up-regulated (A) and downregulated (B) in FUMOZ using BLAST2GO. Significance of the enrichment was assessed using a Fisher's exact test and Benjamini and Hochberg multiple testing correction ( $P < 0.05$ ).

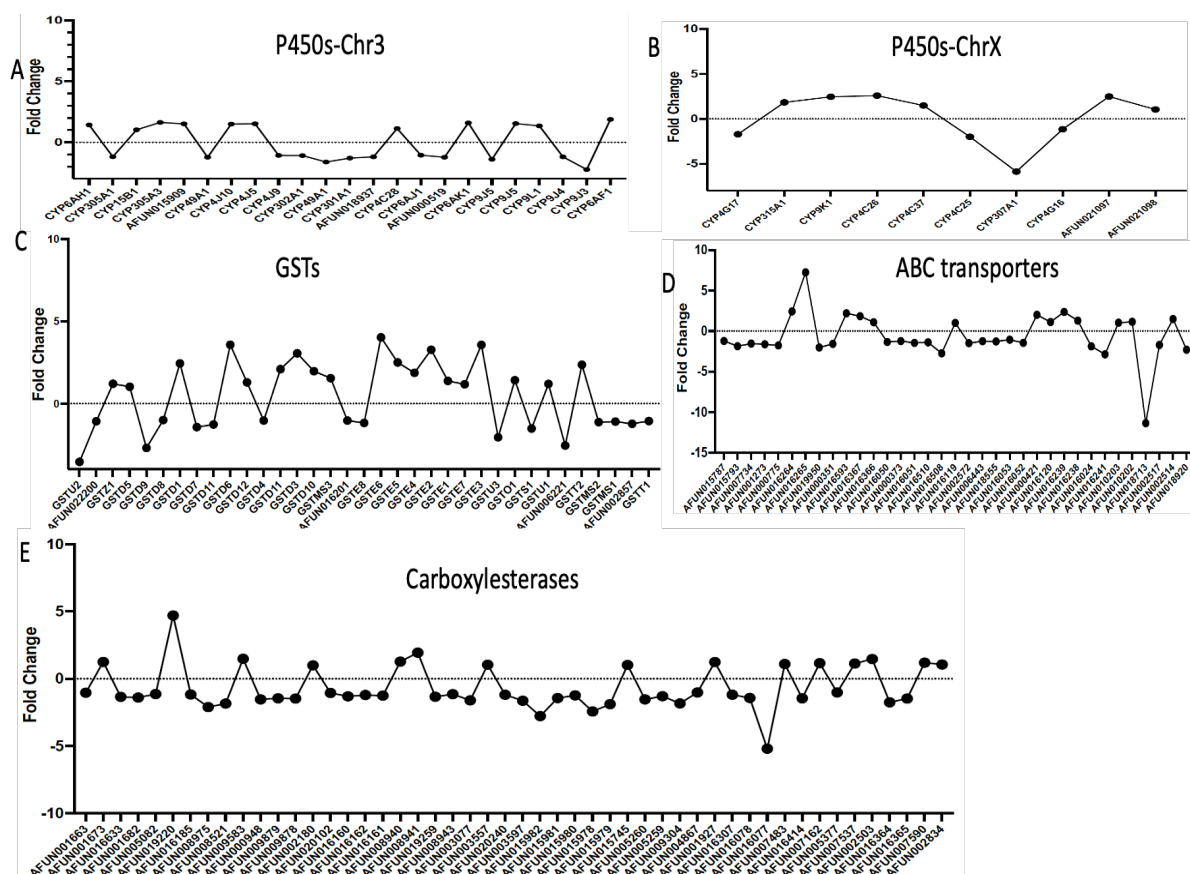

**Figure S3:** Global expression profile of major detoxification gene families across the genome: A) Gene expression pattern of all cytochrome P450 genes on chromosome 3. Value above 0 indicates over-expression in FUMOZ, whereas below 0 is down-regulation compared to FANG. B) is for Cytochrome P450s on X chromosomes. C) Gene Expression patterns of all GSTs. D) Gene expression patterns of all ABC transporter genes across the genome. E) Gene expression patterns of all carboxylesterase genes across the genome.

**Table S1:** List of qRT-PCR primers

| <b>Gene</b>                     | <b>Forward primer</b>       | <b>Reverse primer</b>             | <b>Expected size (bp)</b> |
|---------------------------------|-----------------------------|-----------------------------------|---------------------------|
| <b>Primers used for qRT-PCR</b> |                             |                                   |                           |
| <b>CYP6P9a</b>                  | CAGCGCGTACACCAGATTGTGTAA    | TCACAATTTTTCCACCTTCAAGTAATTACCCGC | 92                        |
| <b>CYP6P9b</b>                  | CAGCGCGTACACCAGATTGTGTAA    | TTACACCTTTTCTACCTTCAAGTAATTACCCGC | 97                        |
| <b>CYP6AA1</b>                  | CATCTGGCTGAATGGCACTA        | TCAACAATGCCATCAAATCG              | 109                       |
| <b>GSTe2</b>                    | GTTTGAAGCAGTTGCCATACTACGAGG | TCAAGCTTTAGCATTTTCCTCCTTTTTGGC    | 101                       |
| <b>CYP6P5</b>                   | ACGTAATCAACGAAACGCTTCGTA    | TCGGTATCTGCACGATTGTT              | 126                       |
| <b>CYP325A</b>                  | GGATACCGATACGGCATGTT        | TGCGTATTTGATGCCCTACA              | 148                       |
| <b>RSP7</b>                     | GTGTTTCGGTTCCAAGGTGAT       | TCCGAGTTCATTTCCAGCTC              | 98                        |
| <b>ACTIN</b>                    | TTAAACCCAAAAGCCAATCG        | ACCGGATGCATACAGTGACA              | 111                       |

**Tables S2: Alignment statistics**

|                              | FANG1               | FANG2               | FANG3               | FANG4               | FUMOZ1              | FUMOZ2              | FUMOZ3              | FUMOZ4              |
|------------------------------|---------------------|---------------------|---------------------|---------------------|---------------------|---------------------|---------------------|---------------------|
| <b>Normal</b>                | 28532364<br>(47.35) | 35604808<br>(81.85) | 35809448<br>(65.72) | 47770060<br>(79.32) | 46362088<br>(83.46) | 46921040<br>(82.42) | 47546860<br>(82.59) | 54134584<br>(82.26) |
| <b>One mate flip</b>         | 131108<br>(0.22)    | 127896<br>(0.29)    | 159186<br>(0.29)    | 151668<br>(0.25)    | 167300<br>(0.3)     | 210360<br>(0.37)    | 174518<br>(0.3)     | 191224<br>(0.29)    |
| <b>Both mate flip</b>        | 448096<br>(0.74)    | 611212<br>(1.41)    | 606734<br>(1.11)    | 793194<br>(1.32)    | 760376<br>(1.37)    | 703322<br>(1.24)    | 757380<br>(1.32)    | 887758<br>(1.35)    |
| <b>Translocated</b>          | 84316<br>(0.14)     | 83372<br>(0.19)     | 87116<br>(0.16)     | 59554<br>(0.1)      | 72126<br>(0.13)     | 117382<br>(0.21)    | 104058<br>(0.18)    | 95094 (0.14)        |
| <b>Mate missing</b>          | 1632069<br>(2.71)   | 1007629<br>(2.32)   | 1824059<br>(3.35)   | 1220564<br>(2.03)   | 963095<br>(1.73)    | 961597<br>(1.69)    | 1050907<br>(1.83)   | 1219629<br>(1.85)   |
| <b>Unaligned</b>             | 29436108<br>(48.85) | 6067197<br>(13.95)  | 16001557<br>(29.37) | 10231588<br>(16.99) | 7225042<br>(13.01)  | 8014273<br>(14.08)  | 7937523<br>(13.79)  | 9280205<br>(14.1)   |
| <b>chr3</b>                  | 13805642<br>(44.78) | 15550846<br>(41.54) | 17103511<br>(44.44) | 21310072<br>(42.62) | 20451495<br>(42.32) | 20239650<br>(41.38) | 20626024<br>(41.56) | 23831609<br>(42.16) |
| <b>chr2</b>                  | 14652708<br>(47.53) | 18898960<br>(50.48) | 18371638<br>(47.74) | 24608550<br>(49.22) | 24133412<br>(49.94) | 24915200<br>(50.94) | 25235854<br>(50.84) | 28450662<br>(50.33) |
| <b>chrX</b>                  | 2369530<br>(7.69)   | 2985002<br>(7.97)   | 3011355<br>(7.82)   | 4076393<br>(8.15)   | 3740060<br>(7.74)   | 3758827<br>(7.68)   | 3771821<br>(7.6)    | 4245996<br>(7.51)   |
| <b>Total number of reads</b> | 60264061            | 43502114            | 54488100            | 60226628            | 55550027            | 56927974            | 57571246            | 65808494            |

**Table S3:** Top 20 over-expressed genes in FUMOZ compared to FANG

| Gene ID    | Q value  | FC    | Log FC | FANG   | FUMOZ    | Description                                                 | Chr  |
|------------|----------|-------|--------|--------|----------|-------------------------------------------------------------|------|
| AFUN019794 | 3.79E-06 | 90.47 | 6.50   | 520.44 | 67882.05 |                                                             | chr2 |
| AFUN014490 | 0.0013   | 82.23 | 6.36   | 5.26   | 410.85   |                                                             | chr3 |
| AFUN015792 | 1.08E-05 | 71.49 | 6.16   | 822.61 | 84176.54 | cytochrome P450; CYP6P9a                                    | chr2 |
| AFUN007421 | 0.00179  | 68.99 | 6.11   | 6.18   | 428.24   |                                                             | chr2 |
| AFUN019207 | 3.70E-06 | 68.98 | 6.11   | 271.30 | 27474.14 |                                                             | chr2 |
| AFUN012016 | 8.68E-08 | 66.49 | 6.06   | 0.25   | 81.39    |                                                             | chr3 |
| AFUN018641 | 0.001703 | 31.03 | 4.96   | 0.98   | 64.15    | Ficolin-1;                                                  | chr3 |
| AFUN019813 | 8.36E-04 | 24.92 | 4.64   | 121.40 | 4612.43  | Retrovirus-related Pol polyprotein from transposon TNT 1-94 | chrX |
| AFUN010785 | 1.45E-04 | 21.74 | 4.44   | 313.78 | 9454.57  | Chromodomain-helicase-DNA-binding protein 4;                | chr3 |
| AFUN018981 | 0.014188 | 19.93 | 4.32   | 19.48  | 306.09   | Transmembrane protease serine 11D;<br>AltName:              | chr3 |
| AFUN020923 | 0.00617  | 19.85 | 4.31   | 3.11   | 57.63    | cuticular protein RR-2 family                               | chr2 |
| AFUN019546 | 4.64E-04 | 18.68 | 4.22   | 12.98  | 350.83   | Histone acetyltransferase Tip60                             | chr2 |
| AFUN020946 | 0.008556 | 16.36 | 4.03   | 10.77  | 153.93   | serine-type endopeptidase;<br>chymotrypsin-2                | chr3 |
| AFUN021228 | 0.001358 | 16.28 | 4.02   | 8.99   | 227.10   | Golgi SNAP receptor complex member                          | chr2 |
| AFUN004822 | 9.68E-04 | 15.30 | 3.94   | 19.66  | 405.09   |                                                             | chr3 |
| AFUN021240 | 3.70E-04 | 15.06 | 3.91   | 46.18  | 1050.18  | Carboxypeptidase Q; AltName:                                | chr2 |
| AFUN005683 | 1.45E-04 | 14.84 | 3.89   | 6.36   | 130.78   | THAP domain-containing protein 6                            | chrX |
| AFUN011284 | 0.017727 | 12.28 | 3.62   | 13.68  | 149.19   |                                                             | chr2 |
| AFUN015252 | 2.01E-04 | 11.73 | 3.55   | 0.15   | 14.87    |                                                             | chr3 |
| AFUN015889 | 6.90E-05 | 11.15 | 3.48   | 744.25 | 11906.60 | cytochrome P450: CYP6P9b                                    | chr2 |
| AFUN019850 | 0.016703 | 10.87 | 3.44   | 5.36   | 46.00    |                                                             | chr3 |
| AFUN009695 | 1.58E-04 | 10.84 | 3.44   | 0.14   | 13.83    |                                                             | chr3 |
| AFUN017249 | 0.01925  | 10.08 | 3.33   | 11.50  | 99.50    | 5S ribosomal RNA                                            | chr3 |

**Table S4: Down-regulated transcripts in FUMOZ compared to FANG**

| Gene ID                              | Corrected P value | FC     | Log FC | Gene Symbol | FUMOZ  | FANG    | Description                                        | Chrom |
|--------------------------------------|-------------------|--------|--------|-------------|--------|---------|----------------------------------------------------|-------|
| <b>Most downregulated in FUMOZ-R</b> |                   |        |        |             |        |         |                                                    |       |
| AFUN001823                           | 0.0002            | -602.4 | -9.2   | AFUN001823  | 12.8   | 581.9   | Group XIIB secretory phospholipase A2-like protein | chr3  |
| AFUN019775                           | 0.0054            | -548.1 | -9.1   | AFUN019775  | 9.3    | 4063.4  | Heat shock protein 70 A1                           | chr2  |
| AFUN019570                           | 0.0051            | -324.6 | -8.3   | AFUN019570  | 45.1   | 12679.1 | Heat shock protein 70 B2                           | chr2  |
| AFUN003205                           | 0.0002            | -283.3 | -8.1   | AFUN003205  | 0.7    | 227.0   | unknown                                            | chr3  |
| AFUN019671                           | 0.0067            | -236.9 | -7.9   | AFUN019671  | 37.3   | 7994.0  | Heat shock protein 70 B2                           | chr2  |
| AFUN019513                           | 0.0067            | -206.3 | -7.7   | AFUN019513  | 27.9   | 4514.6  | Heat shock protein 70 B2                           | chr2  |
| AFUN018693                           | 0.0005            | -202.4 | -7.7   | AFUN018693  | 10.9   | 1313.3  | Thioredoxin peroxidase 4                           | chr3  |
| AFUN019178                           | 0.0064            | -151.2 | -7.2   | AFUN019178  | 20.2   | 2924.8  | Heat shock protein 70 B2                           | chr2  |
| AFUN017562                           | 0.0310            | -148.9 | -7.2   | SSU_rRNA    | 36.4   | 4445.2  | Eukaryotic small subunit ribosomal RNA             | chr3  |
| AFUN019467                           | 0.0082            | -147.0 | -7.2   | AFUN019467  | 59.0   | 8423.1  | Heat shock protein 70 B2                           | chr2  |
| AFUN022250                           | 0.0144            | -144.4 | -7.2   | AFUN022250  | 34.6   | 1446.5  | Serine proteinase stubble;                         | chr3  |
| AFUN001824                           | 0.0001            | -139.3 | -7.1   | AFUN001824  | 31.0   | 644.8   | C2 domain-containing protein                       | chr3  |
| AFUN019289                           | 0.0069            | -134.0 | -7.1   | AFUN019289  | 34.7   | 3839.6  | Heat shock protein 70 B2                           | chr2  |
| AFUN006337                           | 0.0006            | -130.2 | -7.0   | AFUN006337  | 13.8   | 805.6   | chitinase                                          | chr2  |
| AFUN017680                           | 0.0233            | -114.7 | -6.8   | LSU_rRNA    | 29.8   | 1026.5  | Eukaryotic large subunit ribosomal RNA             | chr3  |
| AFUN017729                           | 0.0125            | -85.5  | -6.4   | LSU_rRNA    | 2.5    | 190.3   | Eukaryotic large subunit ribosomal RNA             | chr3  |
| AFUN017400                           | 0.0367            | -79.8  | -6.3   | LSU_rRNA    | 3.3    | 298.7   | Eukaryotic large subunit ribosomal RNA             | chr3  |
| AFUN017608                           | 0.0403            | -72.8  | -6.2   | LSU_rRN     | 2.1    | 242.2   | Eukaryotic large subunit ribosomal RNA             | chr3  |
| AFUN018757                           | 0.0005            | -62.9  | -6.0   | AFUN018757  | 2.5    | 94.4    | Small integral membrane protein 20                 | chr3  |
| <b>Cytochrome P450s</b>              |                   |        |        |             |        |         |                                                    |       |
| AFUN020636                           | 0.0096            | -2.4   | -1.3   | AFUN020636  | 132.1  | 238.7   | cytochrome P450                                    | chr2  |
| AFUN020179                           | 0.0044            | -2.4   | -1.2   | AFUN020179  | 255.7  | 386.4   | cytochrome P450                                    | chr2  |
| AFUN015714                           | 0.0161            | -2.1   | -1.1   | CYP6AD1     | 35.4   | 40.4    | cytochrome P450                                    | chr2  |
| AFUN015866                           | 0.0119            | -2.2   | -1.2   | CYP9J3      | 1371.5 | 2206.3  | cytochrome P450                                    | chr3  |
| AFUN006122                           | 0.0043            | -2.8   | -1.5   | CYP4C27     | 514.9  | 950.1   | cytochrome P450                                    | chr2  |
| <b>ABC transporters</b>              |                   |        |        |             |        |         |                                                    |       |
| AFUN016077                           | 0.0045            | -5.2   | -2.4   | AFUN016077  | 3777.8 | 14533.4 | ATP-binding cassette transporter A                 | chr3  |
| AFUN015978                           | 0.0051            | -2.4   | -1.3   | AFUN015978  | 262.5  | 387.8   | ATP-binding cassette transporter G                 | chr2  |
| AFUN015982                           | 0.0104            | -2.8   | -1.5   | AFUN015982  | 1171.8 | 2293.4  | ATP-binding cassette transporter G                 | chr2  |
| AFUN008975                           | 0.0042            | -2.1   | -1.1   | AFUN008975  | 4980.4 | 6779.1  | ATP-binding cassette transporter H                 | chr2  |
| <b>Carboxylesterases</b>             |                   |        |        |             |        |         |                                                    |       |
| AFUN019950                           | 0.0123            | -2.0   | -1.0   | AFUN019950  | 806.5  | 1007.2  | carboxylesterase                                   | chr2  |
| AFUN016508                           | 0.0042            | -2.7   | -1.5   | AFUN016508  | 39.7   | 55.0    | carboxylesterase juvenile hormone esterase         | chr3  |
| AFUN018713                           | 0.0051            | -11.4  | -3.5   | AFUN018713  | 66.4   | 474.7   | Carboxylic ester hydrolase                         | chr3  |
| AFUN016241                           | 0.0491            | -2.9   | -1.5   | AFUN016241  | 267.5  | 426.8   | Carboxylic ester hydrolase                         | chr3  |
| <b>Others</b>                        |                   |        |        |             |        |         |                                                    |       |
| AFUN003809                           | 0.0222            | -2.1   | -1.1   | CSP3        | 111.1  | 147.9   | chemosensory protein 3                             | chr2  |
| AFUN008656                           | 0.0101            | -55.8  | -5.8   | AFUN008656  | 131.5  | 4350.1  | alpha-crystallin B chain                           | chr3  |
| AFUN001821                           | 0.0018            | -3.3   | -1.7   | GRX1        | 177.1  | 369.3   | glutaredoxin                                       | chr3  |

|            |        |      |      |            |       |       |                           |      |
|------------|--------|------|------|------------|-------|-------|---------------------------|------|
| AFUN006221 | 0.0018 | -2.5 | -1.4 | AFUN006221 | 310.1 | 486.7 | Glutathione peroxidase    | chrX |
| AFUN008426 | 0.0087 | -3.5 | -1.8 | GSTU2      | 60.9  | 159.1 | glutathione S-transferase | chr2 |

**Table S5:** Differentially alternatively spliced genes between FUM0Z and FANG

| Gene ID    | Splicing Index | Transcript    | FANG    | FUM0Z   | Description                                           | Chrom |
|------------|----------------|---------------|---------|---------|-------------------------------------------------------|-------|
| AFUN021186 | 0.77           | AFUN021186-RA | 192.4   | 67.0    | DEAD-box ATP-dependent RNA helicase 30                | chr3  |
| AFUN019220 | 0.75           | AFUN019220-RB | 654.1   | 4429.5  | ATP-binding cassette sub-family A member 3            | chr2  |
| AFUN020353 | 0.60           | AFUN020353-RA | 1766.2  | 1355.0  | 6-phosphofructo-2-kinase/fructose-2,6-bisphosphatase  | chr3  |
| AFUN002009 | 0.58           | AFUN002009-RB | 33589.5 | 50074.6 | 60S ribosomal protein L4                              | chr2  |
| AFUN004135 | 0.49           | AFUN004135-RB | 2938.1  | 5141.9  | Nucleosomal histone kinase 1                          | chr3  |
| AFUN011313 | 0.42           | AFUN011313-RA | 100.8   | 252.7   | Dihydropyrimidinase                                   | chr2  |
| AFUN011575 | 0.42           | AFUN011575-RA | 162.3   | 221.7   | Paired box protein Pax-6                              | chrX  |
| AFUN020206 | 0.36           | AFUN020206-RA | 23899.1 | 29997.9 | Protein kinase C, brain isozyme                       | chr3  |
| AFUN007971 | 0.35           | AFUN007971-RA | 29469.0 | 15671.5 | Tropomyosin-2; AltName                                | chr2  |
| AFUN021345 | 0.35           | AFUN021345-RA | 371.8   | 578.8   | Protein FAM151B                                       | chr2  |
| AFUN011621 | 0.35           | AFUN011621-RA | 3958.3  | 3145.5  | Papilin; Flags: Precursor                             | chr2  |
| AFUN020059 | 0.34           | AFUN020059-RA | 38.1    | 52.3    | Serine proteinase stubble; AltName                    | chr2  |
| AFUN020405 | 0.34           | Novel         | 7193.7  | 6702.0  | Sodium/calcium exchanger 3; AltName                   | chr2  |
| AFUN016021 | 0.34           | AFUN016021-RB | 52162.3 | 64984.9 | Fructose-bisphosphate aldolase                        | chr2  |
| AFUN000373 | 0.33           | AFUN000373-RA | 375.8   | 488.5   | Esterase E4; carboxylesterase                         | chr3  |
| AFUN008882 | 0.31           | AFUN008882-RA | 3828.9  | 4649.0  | Mitochondrial uncoupling protein 4                    | chr2  |
| AFUN007786 | 0.31           | AFUN007786-RB | 3463.0  | 2859.9  | Cytosolic carboxypeptidase-like protein 5             | chr3  |
| AFUN001285 | 0.30           | AFUN001285-RA | 2371.0  | 2974.0  | Uncharacterized family 31 glucosidase KIAA1161        | chr2  |
| AFUN001732 | 0.29           | AFUN001732-RA | 1671.6  | 2565.7  | Putative transmembrane protein INAFM2                 | chrX  |
| AFUN001485 | 0.27           | AFUN001485-RB | 4791.7  | 5655.5  | Dedicator of cytokinesis protein 2                    | chr2  |
| AFUN011127 | 0.26           | AFUN011127-RA | 317.2   | 329.2   | Low-density lipoprotein receptor-related protein 6    | chr3  |
| AFUN003820 | 0.26           | AFUN003820-RB | 974.1   | 422.4   | Nicotinate phosphoribosyltransferase                  | chr2  |
| AFUN019842 | 0.26           | AFUN019842-RB | 20074.7 | 25807.7 | Ankyrin repeat and KH domain-containing protein mask; | chr2  |
| AFUN011633 | 0.26           | Novel         | 2753.0  | 3021.4  | Glutathione-specific gamma-glutamylcyclotransferase 1 | chr2  |
| AFUN020766 | 0.25           | AFUN020766-RB | 8754.0  | 10578.1 | Serine/threonine-protein kinase Genghis Khan          | chr3  |
| AFUN020610 | 0.25           | AFUN020610-RA | 597.2   | 920.7   | Serine palmitoyltransferase small subunit A           | chr2  |
| AFUN010515 | 0.25           | AFUN010515-RA | 1677.9  | 1429.3  | Tubulin-specific chaperone cofactor E-like protein    | chr3  |



**Table S6: Similarity of expression to key entities**

| Gene ID        | Similarity | FANG   | FUM0Z   | Gene Symbol | Description                                                 | Chrom |
|----------------|------------|--------|---------|-------------|-------------------------------------------------------------|-------|
| <b>CYP6P9a</b> |            |        |         |             |                                                             |       |
| AFUN015792     | 1.00       | 795.2  | 83547.3 | CYP6P9a     | Cytochrome P450                                             | chr2  |
| AFUN012016     | 0.92       | 1.0    | 80.9    | AFUN012016  |                                                             | chr3  |
| AFUN019207     | 0.89       | 267.9  | 27164.2 | AFUN019207  |                                                             | chr2  |
| AFUN019794     | 0.88       | 506.0  | 67281.0 | AFUN019794  |                                                             | chr2  |
| AFUN010785     | 0.77       | 295.4  | 9436.6  | AFUN010785  | Chromodomain-helicase-DNA-binding protein 4                 | chr3  |
| AFUN019813     | 0.73       | 113.7  | 4163.2  | AFUN019813  | Retrovirus-related Pol polyprotein from transposon TNT 1-94 | chrX  |
| AFUN019546     | 0.73       | 12.4   | 340.2   | AFUN019546  | Histone acetyltransferase Tip60                             | chr2  |
| AFUN018641     | 0.72       | 3.9    | 52.7    | AFUN018641  | Ficolin-1; AltName: Full                                    | chr3  |
| AFUN005683     | 0.69       | 6.0    | 130.4   | AFUN005683  | THAP domain-containing protein 6                            | chrX  |
| AFUN021240     | 0.67       | 45.2   | 1000.2  | AFUN021240  | Carboxypeptidase Q                                          | chr2  |
| AFUN021228     | 0.66       | 8.3    | 199.4   | AFUN021228  | Golgi SNAP receptor complex member 1                        | chr2  |
| AFUN015889     | 0.63       | 723.4  | 11853.3 | CYP6P9b     | Cytochrome P450                                             | chr2  |
| <b>CYP6P9b</b> |            |        |         |             |                                                             |       |
| AFUN015889     | 1.00       | 723.4  | 11853.3 | CYP6P9b     | cytochrome P450                                             | chr2  |
| AFUN019220     | 0.77       | 654.1  | 4429.5  | ABCA        | ATP-binding cassette sub-family A member 3                  | chr2  |
| AFUN020895     | 0.76       | 242.9  | 1825.3  | CYP6P4a     | Cytochrome P450                                             | chr2  |
| AFUN000622     | 0.74       | 220.4  | 1303.9  | AFUN000622  | Solute carrier family 23 member 2                           | chr2  |
| AFUN019813     | 0.73       | 113.7  | 4163.2  | AFUN019813  | Retrovirus-related Pol polyprotein from transposon TNT 1-94 | chrX  |
| AFUN021239     | 0.73       | 63.3   | 758.3   | AFUN021239  | Carboxypeptidase Q                                          | chr2  |
| AFUN022201     | 0.72       | 4.3    | 48.6    | AFUN022201  | Glutathione peroxidase                                      | chr2  |
| AFUN015936     | 0.72       | 107.7  | 713.7   | Gr20        | Gustatory receptor for sugar taste 64a                      | chr2  |
| AFUN016008     | 0.71       | 112.7  | 595.5   | GSTE6       | Glutathione S-transferase 1                                 | chr2  |
| AFUN016265     | 0.71       | 43.9   | 370.6   | AFUN016265  | carboxylesterase                                            | chr2  |
| AFUN015809     | 0.71       | 486.9  | 2392.7  | GSTE2       | Glutathione S-transferase                                   | chr2  |
| <b>GSTe2</b>   |            |        |         |             |                                                             |       |
| AFUN015809     | 1.00       | 486.9  | 2392.7  | GSTE2       | Glutathione S-transferase                                   | chr2  |
| AFUN020670     | 0.91       | 242.8  | 983.8   | AFUN020670  | Xanthine dehydrogenase                                      | chr3  |
| AFUN006135     | 0.90       | 249.3  | 972.0   | CYP4C36     | Cytochrome P450                                             | chr2  |
| AFUN015811     | 0.89       | 329.2  | 1174.8  | GSTE5       | Glutathione S-transferase                                   | chr2  |
| AFUN007549     | 0.89       | 1041.9 | 3930.9  | CYP9K1      | cytochrome P450                                             | chrX  |
| AFUN015839     | 0.88       | 319.2  | 1293.9  | GSTD3       | Glutathione S-transferase                                   | chr2  |
| AFUN008239     | 0.86       | 217.2  | 818.6   | AFUN008239  | Sulfotransferase family cytosolic 1B member 1               | chr2  |
| AFUN004002     | 0.86       | 4595.5 | 16720.6 | AFUN004002  | Arginosuccinate lyase                                       | chr3  |
| AFUN010918     | 0.86       | 385.0  | 1182.4  | CYP6N1      | cytochrome P450                                             | chr2  |
| AFUN015801     | 0.86       | 702.7  | 2100.6  | CYP6P2      | cytochrome P450                                             | chr2  |
| AFUN016010     | 0.85       | 4085.5 | 12921.1 | GSTD1       | Glutathione S-transferase                                   | chr2  |
| AFUN011515     | 0.85       | 1178.3 | 3512.7  | TPX4        | Peroxiredoxin-6                                             | chr3  |
| AFUN016264     | 0.85       | 70.7   | 232.4   | AFUN016264  | Carboxylesterase                                            | chr2  |
| AFUN016210     | 0.85       | 89.0   | 288.0   | AFUN016210  | Sulfotransferase family cytosolic 1B member 1               | chr3  |

|            |      |       |        |            |                                               |      |
|------------|------|-------|--------|------------|-----------------------------------------------|------|
| AFUN016008 | 0.84 | 112.7 | 595.5  | GSTE6      | Glutathione S-transferase                     | chr2 |
| AFUN015808 | 0.83 | 738.1 | 3158.6 | GSTE3      | Glutathione S-transferase                     | chr2 |
| AFUN015938 | 0.83 | 575.8 | 1872.9 | CYP9M1     | cytochrome P450                               | chr2 |
| AFUN016207 | 0.81 | 140.2 | 666.5  | AFUN016207 | Sulfotransferase family cytosolic 1B member 1 | chr3 |
| AFUN020895 | 0.81 | 242.9 | 1825.3 | AFUN020895 | cytochrome P450                               | chr2 |
| AFUN015767 | 0.80 | 20.3  | 63.5   | GSTD11     | Glutathione S-transferase                     | chr2 |
| AFUN011266 | 0.77 | 55.6  | 168.0  | AFUN011266 | UDP-glucuronosyltransferase 3A1               | chr2 |

**ABCA-AFUN019220**

|            |      |        |         |            |                                               |      |
|------------|------|--------|---------|------------|-----------------------------------------------|------|
| AFUN019220 | 1.00 | 654.1  | 4429.5  | AFUN019220 | ATP-binding cassette sub-family A member 3    | chr2 |
| AFUN015809 | 0.89 | 486.9  | 2392.7  | GSTE2      | Glutathione S-transferase                     | chr2 |
| AFUN016008 | 0.86 | 112.7  | 595.5   | GSTE6      | Glutathione S-transferase                     | chr2 |
| AFUN006135 | 0.84 | 249.3  | 972.0   | CYP4C36    | Cytochrome P450                               | chr2 |
| AFUN015839 | 0.84 | 319.2  | 1293.9  | GSTD3      | Glutathione S-transferase                     | chr2 |
| AFUN020670 | 0.83 | 242.8  | 983.8   | AFUN020670 | Xanthine dehydrogenase                        | chr3 |
| AFUN020895 | 0.83 | 242.9  | 1825.3  | AFUN020895 | Cytochrome P450                               | chr2 |
| AFUN016207 | 0.82 | 140.2  | 666.5   | AFUN016207 | Sulfotransferase family cytosolic 1B member 1 | chr3 |
| AFUN008239 | 0.81 | 217.2  | 818.6   | AFUN008239 | Sulfotransferase family cytosolic 1B member 1 | chr2 |
| AFUN015811 | 0.81 | 329.2  | 1174.8  | GSTE5      | Glutathione S-transferase                     | chr2 |
| AFUN007549 | 0.80 | 1041.9 | 3930.9  | CYP9K1     | Cytochrome P450                               | chrX |
| AFUN016205 | 0.79 | 354.1  | 1253.1  | AFUN016205 | Sulfotransferase family cytosolic 1B member 1 | chr3 |
| AFUN015808 | 0.79 | 738.1  | 3158.6  | GSTE3      | Glutathione S-transferase                     | chr2 |
| AFUN019602 | 0.78 | 377.2  | 1376.1  | AFUN019602 | Solute carrier family 46 member 3             | chr2 |
| AFUN015785 | 0.78 | 247.5  | 775.4   | CYP6AA2    | Cytochrome P450                               | chr2 |
| AFUN015801 | 0.78 | 702.7  | 2100.6  | CYP6P2     | Cytochrome P450                               | chr2 |
| AFUN010918 | 0.78 | 385.0  | 1182.4  | CYP6N1     | Cytochrome P450                               | chr2 |
| AFUN016010 | 0.78 | 4085.5 | 12921.1 | GSTD1      | Glutathione S-transferase                     | chr2 |
| AFUN004002 | 0.77 | 4595.5 | 16720.6 | AFUN004002 | Argininosuccinate lyase; Short                | chr3 |
| AFUN016264 | 0.77 | 70.7   | 232.4   | AFUN016264 | Carboxylesterase                              | chr2 |
| AFUN015767 | 0.77 | 20.3   | 63.5    | GSTD11     | Glutathione S-transferase                     | chr2 |
| AFUN016210 | 0.76 | 89.0   | 288.0   | AFUN016210 | Sulfotransferase family cytosolic 1B member 1 | chr3 |
| AFUN011515 | 0.76 | 1178.3 | 3512.7  | TPX4       | Thioredoxin peroxidase 4                      | chr3 |

**Table S7:** Genes with significant SNPs between FUMOZ and FANG with contrasting percentage of supporting reads of 90-100% in FANG and 0-10% in FUMOZ in comparison to the reference AFUN3.1 genome from FUMOZ strain

| Transcript | Chrom | Start    | Non Syn | Syn | Int | 5' | 3' | Gene       | Description                             |
|------------|-------|----------|---------|-----|-----|----|----|------------|-----------------------------------------|
| AFUN015786 | chr2  | 8531151  | 0       | 7   | 0   | 0  | 1  | CYP6AA1    | Cytochrome P450                         |
| AFUN015785 | chr2  | 8533523  | 1       | 0   | 0   | 0  | 3  | CYP6AA2    | Cytochrome P450                         |
| AFUN015792 | chr2  | 8544505  | 0       | 6   | 0   | 0  | 0  | CYP6P9A    | Cytochrome P450                         |
| AFUN015889 | chr2  | 8554228  | 2       | 2   | 0   | 0  | 2  | CYP6P9b    | Cytochrome P450                         |
| AFUN020895 | chr2  | 8559923  | 0       | 1   | 0   | 0  | 0  | CYP6P4a    | Cytochrome P450                         |
| AFUN015802 | chr2  | 8565228  | 0       | 1   | 0   | 0  | 0  | CYP6P1     | Cytochrome P450                         |
| AFUN015801 | chr2  | 8567086  | 1       | 6   | 0   | 0  | 1  | CYP6P2     | Cytochrome P450                         |
| AFUN019220 | chr2  | 12554528 | 2       | 0   | 0   | 0  | 0  | AFUN019220 | ATP-binding cassette transporter (ABCA) |
| AFUN005864 | chr2  | 16472020 | 0       | 1   | 0   | 0  | 1  | CYP4AR1    | Cytochrome P450                         |
| AFUN015992 | chr2  | 16479851 | 1       | 0   | 0   | 0  | 0  | CYP4D17    | Cytochrome P450                         |
| AFUN015790 | chr2  | 18835030 | 0       | 1   | 0   | 0  | 0  | CYP6AG1    | Cytochrome P450                         |
| AFUN015791 | chr2  | 18838665 | 0       | 4   | 2   | 0  | 2  | CYP6AG2    | Cytochrome P450                         |
| AFUN008975 | chr2  | 29275431 | 0       | 11  | 3   | 2  | 0  | AFUN008975 | ATP-binding cassette transporter (ABCH) |
| AFUN008521 | chr2  | 31863331 | 0       | 2   | 2   | 0  | 2  | AFUN008521 | ATP-binding cassette transporter (ABCH) |
| AFUN002180 | chr2  | 37885682 | 0       | 4   | 0   | 1  | 1  | AFUN002180 | ATP-binding cassette                    |
| AFUN016010 | chr2  | 41556837 | 0       | 0   | 92  | 0  | 0  | GSTD1      | glutathione S-transferase               |
| AFUN010604 | chr2  | 63336975 | 1       | 1   | 0   | 0  | 0  | HPX2       | heme peroxidase 2                       |
| AFUN008941 | chr2  | 72303465 | 0       | 1   | 0   | 0  | 0  | AFUN008941 | ATP-binding cassette transporter (ABCC) |
| AFUN003077 | chr2  | 77004788 | 0       | 1   | 1   | 0  | 0  | AFUN003077 | ATP-binding cassette transporter (ABCG) |
| AFUN003557 | chr2  | 77281890 | 0       | 0   | 70  | 0  | 0  | AFUN003557 | ATP-binding cassette transporter (ABCC) |
| AFUN005623 | chr2  | 77431433 | 0       | 0   | 8   | 0  | 36 | AFUN005623 | CCR4-NOT transcription complex subunit  |
| AFUN020240 | chr2  | 77624199 | 0       | 1   | 0   | 0  | 0  | AFUN020240 | ATP-binding cassette transporter (ABCC) |
| AFUN000819 | chr2  | 79102501 | 0       | 5   | 0   | 0  | 1  | GRX3       | glutaredoxin                            |
| AFUN015918 | chr2  | 82885114 | 1       | 6   | 0   | 3  | 0  | CYP6Z3     | Cytochrome P450                         |
| AFUN015919 | chr2  | 82887380 | 1       | 5   | 0   | 1  | 1  | CYP6Z1     | cytochrome P450                         |
| AFUN015795 | chr2  | 85291221 | 0       | 0   | 0   | 1  | 0  | CYP6M7     | Cytochrome P450                         |
| AFUN015794 | chr2  | 85294344 | 1       | 1   | 0   | 0  | 0  | CYP6M2     | Cytochrome P450                         |
| AFUN010918 | chr2  | 85300817 | 0       | 3   | 0   | 0  | 0  | CYP6N1     | Cytochrome P450                         |
| AFUN020636 | chr2  | 85303624 | 0       | 0   | 0   | 0  | 2  | AFUN020636 | Cytochrome P450                         |
| AFUN015962 | chr2  | 85315445 | 1       | 3   | 0   | 3  | 1  | CYP6N2     | Cytochrome P450                         |

|            |      |          |   |    |    |   |   |            |                                         |
|------------|------|----------|---|----|----|---|---|------------|-----------------------------------------|
| AFUN015775 | chr2 | 87479299 | 0 | 0  | 0  | 1 | 0 | CYP12F2    | Cytochrome P450                         |
| AFUN015774 | chr2 | 87484861 | 1 | 1  | 0  | 0 | 0 | CYP12F4    | Cytochrome P450                         |
| AFUN003597 | chr2 | 90831993 | 0 | 1  | 0  | 0 | 0 | AFUN003597 | ATP-binding cassette                    |
| AFUN015982 | chr2 | 94143669 | 0 | 0  | 0  | 0 | 1 | AFUN015982 | ATP-binding cassette transporter (ABCG) |
| AFUN015980 | chr2 | 94152192 | 1 | 2  | 0  | 0 | 0 | AFUN015980 | ATP-binding cassette transporter (ABCG) |
| AFUN015745 | chr2 | 94162941 | 0 | 2  | 1  | 1 | 0 | AFUN015745 | ATP-binding cassette transporter (ABCG) |
| AFUN005260 | chr2 | 94177266 | 2 | 8  | 21 | 1 | 2 | AFUN005260 | ATP-binding cassette transporter (ABCG) |
| AFUN005259 | chr2 | 94200172 | 1 | 6  | 5  | 0 | 1 | AFUN005259 | ATP-binding cassette transporter (ABCG) |
| AFUN020179 | chr2 | 96631587 | 1 | 0  | 0  | 0 | 0 | AFUN020179 | Cytochrome P450                         |
| AFUN006122 | chr2 | 96816472 | 0 | 1  | 0  | 0 | 0 | CYP4C27    | Cytochrome P450                         |
| AFUN004867 | chr3 | 87198137 | 0 | 2  | 0  | 0 | 3 | AFUN004867 | ATP-binding cassette                    |
| AFUN015907 | chr3 | 89571227 | 0 | 1  | 0  | 0 | 0 | CYP305A3   | Cytochrome P450                         |
| AFUN016050 | chr3 | 10052763 | 0 | 2  | 0  | 0 | 0 | AFUN016050 | Carboxylic ester hydrolase              |
| AFUN015904 | chr3 | 12808612 | 1 | 0  | 0  | 0 | 0 | CYP4J5     | Cytochrome P450                         |
| AFUN007483 | chr3 | 32260692 | 0 | 1  | 0  | 0 | 0 | AFUN007483 | ATP-binding cassette                    |
| AFUN008829 | chr3 | 56790189 | 0 | 0  | 4  | 0 | 0 | GSTS1      | Glutathione S-transferase               |
| AFUN016414 | chr3 | 57053136 | 0 | 1  | 0  | 0 | 0 | AFUN016414 | ATP-binding cassette transporter (ABCA) |
| AFUN007162 | chr3 | 61776505 | 3 | 21 | 11 | 4 | 2 | AFUN007162 | ATP-binding cassette transporter (ABCE) |
| AFUN016024 | chr3 | 65265250 | 0 | 1  | 0  | 0 | 1 | AFUN016024 | carboxylesterase                        |
| AFUN010202 | chr3 | 70745052 | 0 | 1  | 0  | 0 | 0 | AFUN010202 | carboxylesterase                        |
| AFUN001382 | chr3 | 73206528 | 1 | 7  | 0  | 0 | 2 | CYP9J5     | Cytochrome P450                         |
| AFUN001383 | chr3 | 73210543 | 0 | 1  | 0  | 0 | 0 | CYP9J5     | Cytochrome P450                         |
| AFUN015862 | chr3 | 73267772 | 1 | 5  | 0  | 0 | 0 | CYP9L1     | Cytochrome P450                         |
| AFUN015865 | chr3 | 73273647 | 2 | 8  | 0  | 0 | 1 | CYP9J4     | Cytochrome P450                         |
| AFUN015866 | chr3 | 73276616 | 3 | 8  | 0  | 0 | 0 | CYP9J3     | Cytochrome P450                         |
| AFUN005377 | chr3 | 73746552 | 1 | 6  | 0  | 0 | 0 | AFUN005377 | ATP-binding cassette                    |
| AFUN009234 | chr3 | 77067934 | 0 | 2  | 0  | 0 | 0 | GSTU1      | Glutathione S-transferase               |
| AFUN007537 | chr3 | 82705450 | 0 | 0  | 0  | 0 | 1 | AFUN007537 | ATP-binding cassette                    |
| AFUN002517 | chr3 | 86926810 | 0 | 1  | 0  | 0 | 0 | AFUN002517 | carboxylesterase                        |
| AFUN011481 | chrX | 2974301  | 0 | 2  | 0  | 0 | 0 | CYP4G17    | Cytochrome P450                         |
| AFUN007590 | chrX | 7980432  | 0 | 1  | 0  | 4 | 1 | AFUN007590 | ATP-binding cassette                    |
| AFUN002155 | chrX | 10690535 | 0 | 0  | 2  | 0 | 0 | GSTMS1     | Glutathione transferase microsomal      |
| AFUN010428 | chrX | 16589547 | 0 | 3  | 4  | 2 | 0 | CYP4G16    | Cytochrome P450                         |

**Table S8:** Coding region SNPs in Cytochrome P450s between FUMOZ and FANG with contrasting percentage of supporting reads of 90-100% in FANG and 0-10% in FUMOZ in comparison to the reference AFUN3.1 genome from FUMOZ strain

| Transcripts | Gene Name | Nucleotide          | Amino acid                          | Start    | Chrom | Type of SNPs   |
|-------------|-----------|---------------------|-------------------------------------|----------|-------|----------------|
| AFUN015786  | CYP6AA1   | 951T>G              | Thr317Thr                           | 8532239  | chr2  | Synonymous     |
| AFUN015786  | CYP6AA1   | 936C>T              | Phe312Phe                           | 8532254  | chr2  | Synonymous     |
| AFUN015786  | CYP6AA1   | 891T>G              | Leu297Leu                           | 8532299  | chr2  | Synonymous     |
| AFUN015786  | CYP6AA1   | 858T>C              | Asp286Asp                           | 8532332  | chr2  | Synonymous     |
| AFUN015786  | CYP6AA1   | 543C>T              | Cys181Cys                           | 8532647  | chr2  | Synonymous     |
| AFUN015786  | CYP6AA1   | 252G>A              | Leu84Leu                            | 8532938  | chr2  | Synonymous     |
| AFUN015786  | CYP6AA1   | 250T>C              | Leu84Leu                            | 8532940  | chr2  | Synonymous     |
| AFUN015785  | CYP6AA2   | 291T>A              | His97Gln                            | 8535206  | chr2  | NON_Synonymous |
| AFUN015792  | CYP6P9A   | 753A>G              | Leu251Leu                           | 8545397  | chr2  | Synonymous     |
| AFUN015792  | CYP6P9A   | 654G>A              | Leu218Leu                           | 8545496  | chr2  | Synonymous     |
| AFUN015792  | CYP6P9A   | 457C>T              | Leu153Leu                           | 8545693  | chr2  | Synonymous     |
| AFUN015792  | CYP6P9A   | 189G>T              | Leu63Leu                            | 8545961  | chr2  | Synonymous     |
| AFUN015792  | CYP6P9A   | 186_187<br>delinsGT | Glu62_Leu6<br>3<br>delinsGluLe<br>u | 8545962  | chr2  | Synonymous     |
| AFUN015889  | CYP6P9b   | 1151A>G             | Asn384Ser                           | 8554721  | chr2  | NON_Synonymous |
| AFUN015889  | CYP6P9b   | 723A>C              | Ile241Ile                           | 8555206  | chr2  | Synonymous     |
| AFUN015889  | CYP6P9b   | 457C>T              | Leu153Leu                           | 8555472  | chr2  | Synonymous     |
| AFUN015889  | CYP6P9b   | 307A>G              | Ile103Val                           | 8555622  | chr2  | NON_Synonymous |
| AFUN015802  | CYP6P1    | 183A>G              | Gln61Gln                            | 8566692  | chr2  | Synonymous     |
| AFUN015801  | CYP6P2    | 1428C>A             | Arg476Arg                           | 8567509  | chr2  | Synonymous     |
| AFUN015801  | CYP6P2    | 963G>C              | Thr321Thr                           | 8568047  | chr2  | Synonymous     |
| AFUN015801  | CYP6P2    | 861A>G              | Gln287Gln                           | 8568149  | chr2  | Synonymous     |
| AFUN015801  | CYP6P2    | 850T>C              | Leu284Leu                           | 8568160  | chr2  | Synonymous     |
| AFUN015801  | CYP6P2    | 843A>G              | Thr281Thr                           | 8568167  | chr2  | Synonymous     |
| AFUN015801  | CYP6P2    | 701T>C              | Leu234Ser                           | 8568309  | chr2  | NON_Synonymous |
| AFUN015801  | CYP6P2    | 372A>G              | Ala124Ala                           | 8568638  | chr2  | Synonymous     |
| AFUN005864  | CYP4AR1   | 891T>C              | Asn297Asn                           | 16472863 | chr2  | Synonymous     |
| AFUN015992  | CYP4D17   | 801C>G              | Asp267Glu                           | 16481490 | chr2  | NON_Synonymous |
| AFUN015790  | CYP6AG1   | 135T>C              | Ser45Ser                            | 18835284 | chr2  | Synonymous     |
| AFUN015791  | CYP6AG2   | 276C>G              | Val92Val                            | 18840608 | chr2  | Synonymous     |
| AFUN015791  | CYP6AG2   | 279A>G              | Leu93Leu                            | 18840611 | chr2  | Synonymous     |
| AFUN015791  | CYP6AG2   | 393A>T              | Thr131Thr                           | 18840725 | chr2  | Synonymous     |
| AFUN015791  | CYP6AG2   | 1341G>A             | Ser447Ser                           | 18841902 | chr2  | Synonymous     |
| AFUN015918  | CYP6Z3    | 1209G>A             | Lys403Lys                           | 82885537 | chr2  | Synonymous     |
| AFUN015918  | CYP6Z3    | 1173G>C             | Val391Val                           | 82885573 | chr2  | Synonymous     |
| AFUN015918  | CYP6Z3    | 993G>A              | Glu331Glu                           | 82885753 | chr2  | Synonymous     |
| AFUN015918  | CYP6Z3    | 948A>G              | Ser316Ser                           | 82885798 | chr2  | Synonymous     |

|            |          |                     |           |          |      |                |
|------------|----------|---------------------|-----------|----------|------|----------------|
| AFUN015918 | CYP6Z3   | 879A>G              | Val293Val | 82885867 | chr2 | Synonymous     |
| AFUN015918 | CYP6Z3   | 840A>G              | Gly280Gly | 82885906 | chr2 | Synonymous     |
| AFUN015918 | CYP6Z3   | 27G>T               | Leu9Phe   | 82886719 | chr2 | NON_Synonymous |
| AFUN015919 | CYP6Z1   | 1471C>A             | Arg491Arg | 82887622 | chr2 | Synonymous     |
| AFUN015919 | CYP6Z1   | 933G>A              | Thr311Thr | 82888222 | chr2 | Synonymous     |
| AFUN015919 | CYP6Z1   | 471_472<br>delinsCA | His158Asn | 82888682 | chr2 | NON_Synonymous |
| AFUN015919 | CYP6Z1   | 195C>A              | Arg65Arg  | 82888960 | chr2 | Synonymous     |
| AFUN015919 | CYP6Z1   | 84A>G               | Gly28Gly  | 82889071 | chr2 | Synonymous     |
| AFUN015794 | CYP6M2   | 171T>G              | Val57Val  | 85295838 | chr2 | Synonymous     |
| AFUN015794 | CYP6M2   | 4G>T                | Val2Leu   | 85296005 | chr2 | NON_Synonymous |
| AFUN010918 | CYP6N1   | 735C>T              | Phe245Phe | 85301578 | chr2 | Synonymous     |
| AFUN010918 | CYP6N1   | 921T>C              | Gly307Gly | 85301764 | chr2 | Synonymous     |
| AFUN010918 | CYP6N1   | 1005T>C             | Asn335Asn | 85301848 | chr2 | Synonymous     |
| AFUN015962 | CYP6N2   | 450C>T              | Val150Val | 85316097 | chr2 | Synonymous     |
| AFUN015962 | CYP6N2   | 480A>C              | Arg160Arg | 85316127 | chr2 | Synonymous     |
| AFUN015962 | CYP6N2   | 491G>A              | Ser164Asn | 85316138 | chr2 | NON_Synonymous |
| AFUN015962 | CYP6N2   | 1425A>G             | Pro475Pro | 85317133 | chr2 | Synonymous     |
| AFUN015774 | CYP12F4  | 1555G>A             | Asp519Asn | 87484924 | chr2 | NON_Synonymous |
| AFUN015774 | CYP12F4  | 927G>A              | Lys309Lys | 87485673 | chr2 | Synonymous     |
| AFUN006122 | CYP4C27  | 732T>C              | Ala244Ala | 96818349 | chr2 | Synonymous     |
| AFUN015907 | CYP305A3 | 486A>G              | Ser162Ser | 8957858  | chr3 | Synonymous     |
| AFUN015904 | CYP4J5   | 518C>G              | Ser173Cys | 12809135 | chr3 | NON_Synonymous |
| AFUN001382 | CYP9J5   | 1464T>C             | Arg488Arg | 73206900 | chr3 | Synonymous     |
| AFUN001382 | CYP9J5   | 1335C>T             | His445His | 73207029 | chr3 | Synonymous     |
| AFUN001382 | CYP9J5   | 1332T>C             | His444His | 73207032 | chr3 | Synonymous     |
| AFUN001382 | CYP9J5   | 1194A>C             | Ser398Ser | 73207170 | chr3 | Synonymous     |
| AFUN001382 | CYP9J5   | 1128A>G             | Ser376Ser | 73207236 | chr3 | Synonymous     |
| AFUN001382 | CYP9J5   | 864T>A              | Arg288Arg | 73207500 | chr3 | Synonymous     |
| AFUN001382 | CYP9J5   | 66T>C               | Ile22Ile  | 73208849 | chr3 | Synonymous     |
| AFUN001382 | CYP9J5   | 64A>C               | Ile22Leu  | 73208851 | chr3 | NON_Synonymous |
| AFUN001383 | CYP9J5   | 828A>C              | Val276Val | 73211431 | chr3 | Synonymous     |
| AFUN015862 | CYP9L1   | 1104G>A             | Val368Val | 73268402 | chr3 | Synonymous     |
| AFUN015862 | CYP9L1   | 1089A>T             | Glu363Asp | 73268417 | chr3 | NON_Synonymous |
| AFUN015862 | CYP9L1   | 838C>T              | Leu280Leu | 73268668 | chr3 | Synonymous     |
| AFUN015862 | CYP9L1   | 822A>G              | Pro274Pro | 73268684 | chr3 | Synonymous     |
| AFUN015862 | CYP9L1   | 774G>A              | Leu258Leu | 73268732 | chr3 | Synonymous     |
| AFUN015862 | CYP9L1   | 196C>T              | Leu66Leu  | 73269379 | chr3 | Synonymous     |
| AFUN015865 | CYP9J4   | 1494T>C             | Tyr498Tyr | 73273890 | chr3 | Synonymous     |
| AFUN015865 | CYP9J4   | 1362T>C             | Phe454Phe | 73274022 | chr3 | Synonymous     |
| AFUN015865 | CYP9J4   | 1257T>C             | Asp419Asp | 73274127 | chr3 | Synonymous     |
| AFUN015865 | CYP9J4   | 1209A>G             | Pro403Pro | 73274175 | chr3 | Synonymous     |
| AFUN015865 | CYP9J4   | 1032G>T             | Ser344Ser | 73274352 | chr3 | Synonymous     |
| AFUN015865 | CYP9J4   | 873G>A              | Met291Ile | 73274511 | chr3 | NON_Synonymous |

|            |         |         |           |          |      |                |
|------------|---------|---------|-----------|----------|------|----------------|
| AFUN015865 | CYP9J4  | 871A>G  | Met291Val | 73274513 | chr3 | NON_Synonymous |
| AFUN015865 | CYP9J4  | 420A>G  | Thr140Thr | 73274964 | chr3 | Synonymous     |
| AFUN015865 | CYP9J4  | 417G>C  | Ala139Ala | 73274967 | chr3 | Synonymous     |
| AFUN015865 | CYP9J4  | 315C>T  | His105His | 73275069 | chr3 | Synonymous     |
| AFUN015866 | CYP9J3  | 1587T>C | Phe529Phe | 73276794 | chr3 | Synonymous     |
| AFUN015866 | CYP9J3  | 1479T>G | Ala493Ala | 73276902 | chr3 | Synonymous     |
| AFUN015866 | CYP9J3  | 1278G>A | Gly426Gly | 73277168 | chr3 | Synonymous     |
| AFUN015866 | CYP9J3  | 1234T>G | Leu412Val | 73277212 | chr3 | NON_Synonymous |
| AFUN015866 | CYP9J3  | 912T>G  | Ala304Ala | 73277534 | chr3 | Synonymous     |
| AFUN015866 | CYP9J3  | 909G>A  | Glu303Glu | 73277537 | chr3 | Synonymous     |
| AFUN015866 | CYP9J3  | 627A>T  | Glu209Asp | 73277819 | chr3 | NON_Synonymous |
| AFUN015866 | CYP9J3  | 534T>C  | Gly178Gly | 73277912 | chr3 | Synonymous     |
| AFUN015866 | CYP9J3  | 198A>G  | Ala66Ala  | 73278316 | chr3 | Synonymous     |
| AFUN015866 | CYP9J3  | 118T>G  | Ser40Ala  | 73278396 | chr3 | NON_Synonymous |
| AFUN015866 | CYP9J3  | 99T>C   | Pro33Pro  | 73278415 | chr3 | Synonymous     |
| AFUN011481 | CYP4G17 | 1107A>T | Gly369Gly | 2975156  | chrX | Synonymous     |
| AFUN011481 | CYP4G17 | 1005T>C | Arg335Arg | 2975258  | chrX | Synonymous     |
| AFUN010428 | CYP4G16 | 1122T>C | Ser374Ser | 16590631 | chrX | Synonymous     |
| AFUN010428 | CYP4G16 | 987T>C  | Gly329Gly | 16590766 | chrX | Synonymous     |
| AFUN010428 | CYP4G16 | 738C>T  | Leu246Leu | 16591015 | chrX | Synonymous     |

---

**Table S9: Most significant SNPs per chromosome**

| Transcripts | Type of substitution | position  | Nucleotide | Amino acid | Log10(t-test) | Gene name  | Chrom | genome start position | Description                                    |
|-------------|----------------------|-----------|------------|------------|---------------|------------|-------|-----------------------|------------------------------------------------|
| AFUN015792  | SYNONYMOUS           | 785-785   | T>C        | L251L      | 18.5          | CYP6P9a    | chr2  | 8545397               | Cytochrome P450                                |
| AFUN015792  | SYNONYMOUS           | 743-743   | C>T        | L237L      | 21.3          | CYP6P9a    | chr2  | 8545496               | Cytochrome P450                                |
| AFUN015792  | SYNONYMOUS           | 584-584   | T>G        | T184T      | 16.3          | CYP6P9a    | chr2  | 8545598               | Cytochrome P450                                |
| AFUN007146  | 3PRIME_UTR           | 1523-1523 | C>T        |            | 19.6          | AFUN007146 | Chr3  | 61903247              | cytochrome b5 reductase                        |
| AFUN022249  | 3PRIME_UTR           | 1147-1147 | C>A        |            | 20.6          | AFUN022249 | Chr3  | 69648668              | CLIP-domain serine protease                    |
| AFUN020438  | 3PRIME_UTR           | 6739-6739 | T>C        |            | 21            | AFUN020438 | Chr3  | 73934894              | Ecdysone-induced protein 75B                   |
| AFUN009958  | 3PRIME_UTR           | 944-944   | C>A        |            | 19.6          | TPX2       | Chr3  | 81101900              | Thioredoxin peroxidase 5                       |
| AFUN019973  | 5PRIME_UTR           | 118-118   | T>G        |            | 20.1          | AFUN019973 | Chx   | 1587564               | cytochrome c oxidase subunit 6a, mitochondrial |
| AFUN019838  | 5PRIME_UTR           | 508-508   | A>G        |            | 19            | AFUN019838 | Chrx  | 17083881              | no description                                 |



**Table S10:** Genetic variability parameters of resistance genes CYP6P9a and CYP6P9b in FUMOZ and FANG from pooled RNAseq data in comparison to CYP4C36 using non-synonymous substitutions

| <b>Kpome</b>   | <b>n</b> | <b>S</b> | <b>h</b> | <b><math>\pi</math> (k)</b> | <b>D</b>            | <b>D*</b>           |
|----------------|----------|----------|----------|-----------------------------|---------------------|---------------------|
| <b>CYP6P9a</b> |          |          |          |                             |                     |                     |
| <b>FUMOZ-R</b> | 8        | 1        | 2        | 0.00035 (0.53)              | 1.30 <sup>ns</sup>  | 0.80 <sup>ns</sup>  |
| <b>FANG</b>    | 8        | 18       | 8        | 0.0046 (7.0)                | 0.43 <sup>ns</sup>  | -0.21 <sup>ns</sup> |
| <b>Total</b>   | 16       | 18       | 8        | 0.0028 (4.3)                | -0.65 <sup>ns</sup> | -0.68 <sup>ns</sup> |
| <b>CYP6P9b</b> |          |          |          |                             |                     |                     |
| <b>FUMOZ-R</b> | 8        | 1        | 2        | 0.00035 (0.53)              | 1.30 <sup>ns</sup>  | 0.80 <sup>ns</sup>  |
| <b>FANG</b>    | 8        | 16       | 8        | 0.0045 (6.9)                | 0.63 <sup>ns</sup>  | 0.89 <sup>ns</sup>  |
| <b>Total</b>   | 16       | 18       | 10       | 0.0032 (4.9)                | -0.44 <sup>ns</sup> | 0.76 <sup>ns</sup>  |
| <b>CYP4C36</b> |          |          |          |                             |                     |                     |
| <b>FUMOZ-R</b> | 8        | 8        | 5        | 0.0011 (1.78)               | -1.06 <sup>ns</sup> | -0.72 <sup>ns</sup> |
| <b>FANG</b>    | 8        | 8        | 6        | 0.0018( 2.8)                | -0.36 <sup>ns</sup> | -0.19 <sup>ns</sup> |
| <b>Total</b>   | 16       | 11       | 10       | 0.0014 (2.2)                | -1.36 <sup>ns</sup> | -1.30 <sup>ns</sup> |

N= number of sequences (2n); S, number of polymorphic sites;  $\pi$ , nucleotide diversity (k= mean number of nucleotide differences); D and D\* Tajima's and Fu and Li's statistics; ns, not significant
